1 **Role of posterodorsal medial amygdala urocortin-3 in pubertal timing in female mice**

2 Deyana Ivanova<sup>1</sup>, Xiao-Feng Li<sup>1</sup>, Yali Liu<sup>2</sup>, Caitlin McIntyre<sup>1</sup>, Cathy Fernandes<sup>3,4</sup>, Geffen  
3 Lass<sup>1</sup>, Lingsi Kong<sup>1</sup> and Kevin T O’Byrne<sup>1</sup>

4 <sup>1</sup>Department of Women and Children’s Health, Faculty of Life Science and Medicine, King’s  
5 College London, UK

6 <sup>2</sup>Department of Assisted Reproduction, Shanghai Ninth People's Hospital, Shanghai Jiaotong  
7 University School of Medicine, Shanghai, People's Republic of China.

8 <sup>3</sup>Social, Genetic & Developmental Psychiatry Centre, Institute of Psychiatry, Psychology &  
9 Neuroscience, King’s College London, UK

10 <sup>4</sup>MRC Centre for Neurodevelopmental Disorders, King’s College London, UK

11 Corresponding author’s contact details: Deyana Ivanova ([deyana.ivanova@kcl.ac.uk](mailto:deyana.ivanova@kcl.ac.uk);  
12 <https://orcid.org/0000-0003-1508-166X>) and Kevin T O’Byrne ([kevin.obyrne@kcl.ac.uk](mailto:kevin.obyrne@kcl.ac.uk);  
13 <https://orcid.org/0000-0002-2548-4182>), Department of Women and Children’s Health,  
14 School of Life Course and Population Sciences, Faculty of Life Science and Medicine, King’s  
15 College London, 2.92W Hodgkin Building, Guy’s Campus, London SE1 1UL, UK.

16 Reprint requests: Deyana Ivanova, Department of Women and Children’s Health, School of  
17 Life Course Sciences, Faculty of Life Science and Medicine, King’s College London, 2.92W  
18 Hodgkin Building, Guy’s Campus, London SE1 1UL, UK.

## 19 **Abstract**

20 Post-traumatic stress disorder impedes pubertal development and disrupts pulsatile LH  
21 secretion in humans and rodents. The posterodorsal sub-nucleus of the medial amygdala  
22 (MePD) is an upstream modulator of the hypothalamic gonadotropin-releasing hormone  
23 (GnRH) pulse generator, pubertal timing, as well as emotional processing and anxiety.  
24 Psychosocial stress exposure alters neuronal activity within the MePD increasing the  
25 expression of Urocortin3 (Ucn3) and its receptor corticotropin-releasing factor type-2 receptor  
26 (CRFR2) while enhancing the inhibitory output from the MePD to key hypothalamic  
27 reproductive centres. We test the hypothesis that psychosocial stress, processed by the MePD,  
28 is relayed to the hypothalamic GnRH pulse generator to delay puberty in female mice. We  
29 exposed C57Bl6/J female mice to the predator odor, 2,4,5-Trimethylthiazole (TMT), during  
30 pubertal transition and examined the effect on pubertal timing, pre-pubertal LH pulses and  
31 anxiety-like behaviour. Subsequently, we virally infected Ucn3-cre-tdTomato female mice  
32 with stimulatory DREADDs targeting MePD Ucn3 neurons and determined the effect on  
33 pubertal timing and pre-pubertal LH pulse frequency. Exposure to TMT during pubertal  
34 development delayed puberty, suppressed pre-pubertal LH pulsatility and enhanced anxiety-  
35 like behaviour, while activation of MePD Ucn3 neurons reduced LH pulse frequency and  
36 delayed puberty. Early psychosocial stress exposure decreases GnRH pulse generator  
37 frequency delaying puberty while inducing anxiety-behaviour in female mice, an effect  
38 potentially involving Ucn3 neurons in the MePD.

## 39 **Introduction**

40 In humans post-traumatic stress disorder (PTSD) is associated with altered pubertal timing and  
41 the development of anxiety disorders (1,2). Predator odor exposure is a classic model for PTSD  
42 in rodents (3) and has been shown to delay puberty (4), suppress luteinizing hormone (LH)  
43 pulse frequency (5) and inhibit the pre-ovulatory LH surge (6). The gonadotropin-releasing  
44 hormone (GnRH) pulse generator that controls the hypothalamus-pituitary-gonadal (HPG) axis  
45 and pubertal development is restrained in the juvenile, but reactivated at a critical time point  
46 with increased frequency leading to the initiation of puberty (7). However, the neural  
47 mechanisms controlling pubertal timing are not fully established.

48 Kisspeptin (*kiss1*) is known to be a major gatekeeper of pubertal onset. An absence of the  
49 *kiss1* gene and *kiss1* receptor (*kiss1r*) in mice and humans leads to a loss of gonadal maturation  
50 and a lack of pubertal onset (8,9), and treatment with kisspeptin can reactivate the HPG axis  
51 during the juvenile hiatus in monkeys and rats (10,11). *Kiss1* neurons are located in the  
52 anteroventral periventricular nucleus (AVPV) and arcuate nucleus (ARC) of the hypothalamus  
53 in mice (12). The ARC *kiss1* neurons, known as KNDy because they co-express neurokinin B  
54 (NKB) and dynorphin A (Dyn), are a critical component of the GnRH pulse generator (12–14).  
55 The activation of KNDy neurons induces pulsatile release of *kiss1* acting on GnRH dendrons  
56 in the median eminence to stimulate pulsatile GnRH secretion (15). The AVPV *kiss1* neurons  
57 project to GnRH cell bodies and proximal dendrites and are known to control the preovulatory  
58 LH surge and ovulation in rodents (16). In the juvenile, a neurobiological brake exerted on the  
59 ARC GnRH pulse generator suppresses pulsatile *kiss1* release in the median eminence,  
60 however the nature of this upstream inhibition of the GnRH pulse generator, which is released  
61 at the end of the juvenile phase to trigger puberty is unknown (7).

62 The amygdala, a stress-sensitive part of the limbic brain, is involved in processing anxiety and  
63 fear as well as modulating pubertal timing and the HPG axis. Lesioning of the amygdala

64 advances menarche in female rhesus macaques (17), whereas electrical stimulation of this  
65 region delays puberty in rats (18). Specific lesioning of the posterodorsal sub-nucleus of the  
66 medial amygdala (MePD) advances puberty in rats (19), suggesting this region may play a key  
67 role in exerting an inhibitory break on pubertal timing. The MePD sends GABAergic  
68 projections to various hypothalamic reproductive centres (20,21) and has been shown to project  
69 directly to ARC KNDy neurons, although their neurochemical phenotype is undetermined  
70 (22,23). Interestingly, the MePD contains a kiss1 neuronal population (24) and antagonism of  
71 MePD kiss1 delays puberty, disrupts estrous cyclicity and the LH surge in rats (25). Moreover,  
72 selective optogenetic stimulation of MePD kiss1 neurons increases LH pulse frequency in mice  
73 (26). The MePD is highly responsive to psychosocial stress, exhibiting a distinct firing pattern  
74 in response to predator odor (27) and recently cat odor was found to delay puberty, disrupt  
75 estrous cyclicity and induce a fear response in rats (4). The MePD may be a central hub  
76 involved in the integration of external olfactory and anxiogenic signals with the GnRH pulse  
77 generator.

78 Central administration of the stress neuropeptide corticotrophin releasing factor (CRF) dose-  
79 dependently delays puberty, while CRF-receptor antagonism advances puberty in rats (28).  
80 Urocortin-3 (Ucn3), a member of the CRF family and an endogenous ligand for CRF type 2  
81 receptors (CRFR2) is found in abundance in the MePD (29). Psychosocial stressors, including  
82 social defeat and restraint, increase cfos expression in CRFR2 positive neurons and increase  
83 Ucn3 mRNA expression in the MePD of rodents (30). Moreover, we have recently shown that  
84 MePD Ucn3 mediates predator odor and restraint stress-induced suppression of pulsatile LH  
85 secretion in mice (5).

86 In this study, we aimed to determine whether chronic predator odor stress exposure suppresses  
87 pre-pubertal LH pulse frequency and delays pubertal timing in female mice. Additionally, we  
88 assessed social, anxiety and fear-like behaviour as measures of psychosocial stress in predator

89 odor-exposed pre-pubertal female mice. Finally, we aimed to determine whether MePD Ucn3  
90 signalling is involved in modulating pre-pubertal LH pulse frequency and pubertal timing in  
91 female mice.

## 92 **Materials and Methods**

### 93 **Mice**

94 Breeding pairs of C57Bl6/J mice were purchased from Charles River Laboratories  
95 International, Inc. For Ucn3-cre mice, cryopreserved sperm of strain (Tg(Ucn3-  
96 cre)KF43Gsat/Mmucd; congenic on C57BL/6 background) was acquired from MMRRC  
97 GENSAT. Breeding pairs of heterozygous transgenic Ucn3-cre mice were recovered by  
98 insemination of female C57Bl6/J mice at King's College London. Genotyping of Ucn3-cre  
99 mice was performed using PCR to detect heterozygosity. Heterozygous Ucn3-cre mice were  
100 bred with cre-activated tdTomato reporter mice (strain B6.Cg-Gt(ROSA)26Sortm9(CAG-  
101 tdTomato)Hze/J; congenic on C57BL/6 background obtained from The Jackson Laboratory,  
102 Bar Harbor, ME, USA) to obtain Ucn3-cre-tdTomato mice, as previously described (5,29).  
103 Litter size was reduced to 6-8 pups 2-3 days after birth (on pnd 2-3) to standardise body weight,  
104 which can alter pubertal development. Mice aged between 21 to 45 days were group housed  
105 in individually ventilated cages equipped with wood-chip bedding and nesting material with  
106 food and water ad libitum and sealed with a HEPA-filter at  $25 \pm 1$  °C in a 12:12 h light/dark  
107 cycle, lights on at 07:00 h. All procedures were carried out following the United Kingdom  
108 Home Office Regulations and approved by the Animal Welfare and Ethical Review Body  
109 Committee at King's College London.

## 110 **Stereotaxic adeno-associated-virus injection**

111 All surgical procedures were carried out with aseptic conditions and under general anaesthesia  
112 using ketamine (Vetalar, 100 mg/kg, i.p.; Pfizer, Sandwich, UK) and xylazine (Rompun, 10  
113 mg/kg, i.p.; Bayer, Leverkusen, Germany). The mouse brain atlas of Paxinos and Franklin  
114 (31) was used to obtain target coordinates for the MePD (2.15 mm lateral, -1.25 mm from  
115 bregma, at a depth of -5.30 mm below the skull surface) of pre-pubertal mice. Mice at pnd 14  
116 were temporarily taken from their mother and secured in a David Kopf stereotaxic frame (Kopf  
117 Instruments), a small skin incision was made to reveal the skull and two small holes were  
118 drilled above the location of the MePD. Bilateral stereotaxic viral injections of the stimulatory  
119 adeno-associated-virus (AAV) carrying the DIO-hM3D-mCitrine, DREADD, construct  
120 (AAV-hSyn-DIO-HA-hM3D(Gq)-IRES-mCitrine,  $3 \times 10^{11}$  GC/ml, Serotype:5; Addgene) was  
121 administered intra-MePD using the robot stereotaxic system (Neurostar, Tubingen, Germany),  
122 performed for the targeted expression of DIO-hM3D-mCitrine in MePD Ucn3 neurons in  
123 Ucn3-cre-tdTomato mice. AAV-hSyn-DIO-HA-hM3D(Gq)-IRES-mCitrine (150 nl) was  
124 bilaterally injected into the MePD using a 2- $\mu$ l Hamilton micro syringe (Esslab, Essex, UK)  
125 over 10 min and the needle was left in position for a further 5 min then slowly lifted over 2  
126 min. Mice that were cre-positive received the AAV-hM3D injection (test mice) or a control  
127 virus AAV-YFP (Addgene) (control mice) where the control virus does not contain the DIO-  
128 hM3D-mCitrine construct. The mice were placed back with the mother for a further 7 days  
129 until wean day (pnd 21). Nine Ucn3-cre-tdTomato mice received the AAV-hM3D injection,  
130 6 Ucn3-cre-tdTomato mice received the control AAV-YFP, 4 Ucn3-cre-negative mice without  
131 surgery received only CNO and 3 Ucn3-cre-tdTomato mice without surgery did not receive  
132 CNO.

### 133 **Chronic pre-pubertal predator-odor exposure and puberty evaluation**

134 Female pups were weaned on pnd 21 and separated into control and test groups. To investigate  
135 the effects of chronic pre-pubertal psychosocial stress mice were removed from their home  
136 cages, singly housed in new cages and left to habituate for 10 min. After the habituation period,  
137 the mice were exposed to 12  $\mu$ l of 2,4,5-Trimethylthiazole (TMT; synthetic extract of fox urine;  
138  $\geq$ 98% purity; Sigma-Aldrich, UK) pipetted on a small circular piece of filter paper in a petri  
139 dish placed in the centre of the cage for 20 min. The mice were exposed to TMT daily, at  
140 random time points, for 14 days (from pnd 21 to 35). Control mice were exposed to filter paper  
141 soaked with 12  $\mu$ l of ddH<sub>2</sub>O water. To rule out the possibility that physiological and  
142 behavioural responses in TMT-exposed mice resulted from novelty of scent we repeated the  
143 experiment with 85 mM of ethyl vanillin ( $\geq$ 98% purity; Sigma-Aldrich UK) as a control scent  
144 in a separate cohort of mice. Mice were monitored from pnd 24 for vaginal opening (VO) and  
145 first estrous (FE) indicated by epithelial cell cornification. Once the occurrence of VO was  
146 detected, vaginal smears were taken to determine the exact day of FE.

### 147 **Pre-pubertal blood sampling**

148 The effect of TMT exposure on pre-pubertal LH pulses was measured, on pnd 26 and 29. Mice  
149 were handled twice daily for 10 min to habituate to tail-tip blood collection for at least 7 days  
150 prior to blood sampling, as described previously (5). For LH measurement, 3  $\mu$ l of blood was  
151 collected every 5 min for 80 min. Blood sampling was performed on pnd 26 and 29 during the  
152 period of daily TMT exposure (pnd 21-35). Blood samples were collected at least 2 h before  
153 TMT-exposure on these days. Blood collection was performed between 09:00-12:00 h.  
154 For Ucn3 DREADDs experiments, blood sampling was performed on pnd 29 during the period  
155 of daily CNO administration (pnd 21-35), as described above. Blood collection was performed  
156 between 09:00-12:00 h.

157 **Behavioural tests**

158 ***Light Dark Box***

159 The same cohort of C57Bl6/J female mice were transported to a new room (lights off) and left  
160 to habituate for 30 min. Mice were placed in the centre of the light compartment facing towards  
161 the dark compartment. The time spent in each compartment (entry with all 4 limbs) was  
162 recorded manually over a period of 5 min by two independent observers. The LDB test was  
163 carried out on pnd 19, 27 and 40. Behaviour testing performed during the period of daily TMT  
164 exposure (pnd 21-35) and was measured before the exposure to TMT on that day. This applies  
165 to all behaviour tests performed during the TMT exposure period. All behaviour tests were  
166 performed between 11:00-13:00 h.

167 ***Social interaction with familiar conspecific***

168 The same cohort of C57Bl6/J female mice were transported to a new dimly lit room and left to  
169 habituate for 30 min. Experimental mice and a same sex familiar conspecific (similar age,  
170 weight and strain) were placed simultaneously into the test arena (a new cage with clean wood-  
171 chip bedding). The time spent following, sniffing, grooming and mounting the conspecific was  
172 monitored and recorded manually over a period of 5 min by two independent observers. The  
173 social interaction test was carried out on pnd 19, 27 and 40.

174 ***Elevated Plus maze***

175 The same cohort of C57Bl6/J female mice were transported to a new room (lights on) and left  
176 to habituate for 30 min. Mice were placed in the centre of the maze facing towards the closed  
177 arms. The time spent in each part of the maze (open, centre and closed; entry with all 4 limbs)  
178 was recorded manually over a period of 5 min by two independent observers. The EPM test  
179 was carried out on pnd 20, 28 and 41.



180 **Chronic DREADD activation of Ucn3 neurons in the MePD**

181 For DREADDs experiments, stock solution of Clozapine-N-oxide (CNO) (Tocris Bio-technie,  
182 Abingdon, UK) was made by dissolving 5 mg of CNO in 1 ml of 0.9% sterile saline solution  
183 and stored at 4 °C. CNO was made fresh daily and administered via drinking water at a final  
184 concentration of 0.5 mg CNO/ kg, as described previously (32) for 14 days from pnd 21-35.  
185 Mice were monitored from pnd 22 for vaginal opening (VO) and first estrous (FE), as described  
186 above.

187 **Validation of AAV injection**

188 On pnd 50, Ucn3-cre-tdTomato mice were anaesthetised with a lethal dose of ketamine.  
189 Transcardial perfusion was performed with heparinised saline for 5 min followed by ice-cold  
190 4% paraformaldehyde (PFA) in phosphate buffer (pH 7.4) for 15 min with a pump (Minipuls,  
191 Gilson, Villiers Le Bel, France). Brains were immediately collected and fixed in 15% sucrose  
192 in 4% PFA at 4 °C and left to sink. Brains were then transferred to 30% sucrose in phosphate-  
193 buffered saline (PBS) and left to sink. Brains were snap-frozen in isopropanol on dry ice and  
194 stored in -80°C. Every third coronal brain section, 30-µm/section, was collected using a  
195 cryostat (Bright Instrument Co., Luton, UK) through-out the MePD region corresponding to -  
196 1.34 mm to -2.70 mm from bregma. Brain sections were mounted on microscope slides, air  
197 dried and covered with ProLong Antifade mounting medium (Molecular Probes, Inc. OR,  
198 USA). The number of tdTomato labelled and AAV-hM3D-mCitrine infected Ucn3 neurons  
199 per side per slice in the MePD was quantified from 4 slices. For AAV-hM3D-mCitrine injected  
200 Ucn3-cre-tdTomato mice we determined whether Ucn3 neurons were infected in the MePD  
201 region by merging td-Tomato fluorescence of Ucn3 neurons with mCitrine fluorescence in the  
202 MePD. Images were taken using Axioskop 2 Plus microscope (Carl Zeiss) equipped with

203 axiovision, version 4.7 (Carl Zeiss). Only data from animals with correct AAV injection were  
204 analysed.

### 205 **LH pulse detection and analysis**

206 Blood samples were processed with a LH ELISA, as previously reported (33). Capture  
207 antibody (monoclonal antibody, anti-bovine LH $\beta$  subunit, AB\_2665514) was purchased from  
208 Department of Animal Science at the University of California, Davis. Mouse LH standard  
209 (AFP-5306A) and primary antibody (polyclonal antibody, rabbit LH antiserum, AB\_2665533)  
210 were obtained from Harbour-UCLA (California, USA). Secondary antibody (Horseradish-  
211 Peroxidase (HRP)-linked donkey anti-rabbit IgG polyclonal antibody, AB\_772206) was  
212 purchased from VWR International (Leicestershire, UK). Inter-assay and intra-assay  
213 variations were 4.6% and 10.2%, respectively and the assay sensitivity was 0.0015 ng/mL.  
214 ODs of the standards were plotted against the log of the standard concentrations, non-linear  
215 regression to fit the points and parameters were extracted to calculate the concentration of LH  
216 (ng/ml) in blood samples, as previously described (33). The LH concentration at every time  
217 point of blood collection was plotted as a line and scatter graph using Igor Pro 7, Wavemetrics,  
218 Lake Oswego, OR, USA. DynPeak algorithm was used for the detection of LH pulses (34).

### 219 **Statistics**

220 For TMT-exposed and DREADD injected female pre-pubertal mice, data obtained for VO and  
221 FE was analysed using RM one-way ANOVA. Data obtained for performance on LDB, SI and  
222 EPM, LH pulse frequency and body weight measure were analysed using RM two-way  
223 ANOVA. Statistics were performed using Igor Pro 7, Wavemetrics, Lake Oswego, OR, USA.  
224 Data was represented as mean  $\pm$  SEM and +p<0.05, ++p<0.001 and +++p<0.0001 were  
225 considered to be significant.

## 226 **Results**

### 227 **Chronic TMT exposure delays puberty onset**

228 TMT exposure during the pubertal transition period, pnd 21 to 35, delayed FE without altering  
229 VO compared water and ethyl vanillin controls in C57Bl6/J female mice (Fig. 1, A and B;  
230 Control vs TMT, +++ $p < 0.0001$ ; TMT,  $n=14$ , water control,  $n=6$ , ethyl vanillin control,  $n=4$ ).  
231 Data for water and ethyl vanillin exposed control mice were combined as control since there  
232 was no significant difference between the two control groups. Body weight was unaffected  
233 between the experimental groups (Fig. 1, C; Control vs TMT). The data from this study shows  
234 that predator-odor stress exposure during the pubertal transition delays pubertal onset.

### 235 **Chronic TMT exposure decreases pre-pubertal LH pulse frequency**

236 TMT exposure during the pubertal transition period, pnd 21 to 35, suppressed pre-pubertal LH  
237 pulse frequency on pnd 26 and 29 compared to water and ethyl vanillin controls in C57Bl6/J  
238 female mice (Fig. 2, A-E; Control vs TMT, ++ $p < 0.001$ ; TMT,  $n=8$ , water control,  $n=6$ , ethyl  
239 vanillin control,  $n=3$ ). On pnd 29, the average LH pulse frequency for the control group tended  
240 to increase compared to the control group on pnd 26 potentially marking an acceleration of  
241 GnRH pulse generator activity approaching the onset of puberty (Fig. 2, A, C and E). The  
242 results of this experiment are summarised in the figure 2E. Data for water and ethyl vanillin  
243 exposed control mice were combined as control since there was no significant difference  
244 between the two control groups. The data from this study shows that predator-odor stress  
245 exposure during the pubertal transition inhibits pre-pubertal LH pulsatility.

### 246 **Chronic TMT exposure induced long-lasting anxiety and fear-like behaviour**

247 We investigated anxiety and fear-like behaviour induced by TMT-exposure during the pubertal  
248 transition period, pnd 21 to 35 in in C57Bl6/J female mice. Anxiety and fear-behaviour were

249 assessed using standard anxiety and fear tests, the LDB, SI and EPM, on pnd 19 or 20 (prior to  
250 day of weaning and TMT-exposure), pnd 27 or 28 (during the TMT exposure period) and pnd  
251 40 or 41 (a week after termination of TMT-exposure). The first LDB, SI and EPM trial on pnd  
252 19 or 20, prior to weaning, confirms no group difference in anxiety before the beginning of  
253 TMT-exposure (Fig. 3, A-C). TMT-exposed mice spent significantly less time in the light  
254 compartment of the LDB as well as socialising with a familiar conspecific compared to the  
255 control group on pnd 27, but not on pnd 40 (Fig. 3, A, B; Control vs TMT, +p<0.05; TMT,  
256 n=14, water control, n=6, ethyl vanillin control, n=4). TMT-exposed mice spent less time in  
257 the open arms of the EPM on pnd 28 and pnd 41 compared to controls (Fig. 3, C; Control vs  
258 TMT, ++p<0.001; TMT, n=14, water control, n=6, ethyl vanillin control, n=4). It is  
259 acknowledged that repeat testing on the EPM assesses phobia/fear (35). On pnd 20, pnd 28  
260 and 41, within-group analysis showed no significant differences in the total time spent in the  
261 open arms of the EPM across the different test days in the control group. However, within-  
262 group analysis of the TMT-exposed group showed a significant difference in time-spent in the  
263 open arm of the EPM on pnd 41 compared to pnd 28 (Fig. 3, C; TMT on pnd 28 vs TMT on  
264 pnd 41, ###p<0.0001). TMT-exposure during pubertal transition had a long-lasting effect on  
265 anxiety and fear/phobia.

### 266 **Selective expression of DREAD(Gq) in MePD Ucn3 neurons**

267 Evaluation of m-Citrine, hM3D, expression in tdTomato labelled neurons from AAV-injected  
268 Ucn3-cre-tdTomato mice revealed that  $86 \pm 5\%$  of MePD Ucn3 neurons expressed hM3D and  
269 the number of tdTomato labelled Ucn3 neurons per side per slice in the MePD was counted at  
270  $72.90 \pm 5.48$  (mean  $\pm$  SEM) with the number of AAV-hM3D-mCitrine infected neurons being  
271  $63.00 \pm 6.83$  (mean  $\pm$  SEM) (n=8). A representative example is shown in Fig 4, A-F.

## 272 **Selective DREADD activation of Ucn3 neurons in the MePD delays puberty onset**

273 Bilateral DREADD activation of MePD Ucn3 neurons during the pubertal transition period,  
274 pnd 21 to 35, of Ucn3-cre-tdTomato mice delayed FE without altering VO compared to non-  
275 surgery and AAV-YFP controls (Fig. 5, A and B; Control vs DREADD, +p<0.05; DREADD,  
276 n=8, control AAV, n=6, cre-negative control, n=4, no CNO, n=3). Data for cre-negative  
277 control, no CNO and control AAV-YFP injected mice were combined as control since there  
278 was no significant difference between the control groups. Body weight was unaffected  
279 between the experimental groups (Fig. 5, C; Control vs DREADD). These data show that  
280 activation of MePD Ucn3 during the pubertal transition delays pubertal timing. Mice with  
281 misplaced injections (n=1) were excluded from the analysis.

## 282 **DREADD activation of Ucn3 neurons in the MePD suppresses pre-pubertal LH pulse** 283 **frequency**

284 Bilateral DREADD activation of MePD Ucn3 neurons during the pubertal transition period,  
285 pnd 21 to 35, of Ucn3-cre-tdTomato mice suppressed pre-pubertal LH pulse frequency sampled  
286 on pnd 29 compared to controls (Fig. 6, A, B and C; Control vs DREADD, +p<0.05; DREADD,  
287 n=5, control AAV, n=3, cre-negative control, n=3). Data for cre-negative control and control  
288 AAV-YFP injected mice were combined as control since there was no significant difference  
289 between the control groups. These data show that activation of MePD Ucn3 during pubertal  
290 transition suppresses pre-pubertal pulsatile LH secretion. Mice with misplaced injections  
291 (n=1) were excluded from the analysis.

## 292 **Discussion**

293 The present study shows for the first time that chronic exposure to the psychogenic stressor,  
294 predator odor, from pnd 21 for 14 days suppresses the pubertal acceleration of LH pulse

295 frequency, delaying puberty onset, while concurrently inducing long-lasting anxiety and fear-  
296 like behaviour. Moreover, DREADD activation of MePD Ucn3 neurons during this same  
297 developmental period delays puberty onset while suppressing pre-pubertal LH pulse frequency,  
298 demonstrating that MePD Ucn3 signalling may play an important role in stress-related changes  
299 in pubertal timing.

300 Hypothalamic kiss1 signalling is pivotal in regulating puberty onset in various species,  
301 including rodents and humans (7,11). Pubertal onset is thought to be timed by an increase in  
302 GnRH pulse generator frequency, however the mechanisms underlying the timing of ARC  
303 kiss1 neuronal activation to trigger pubertal onset are not well established. Nevertheless,  
304 puberty onset has been associated with increased ARC Tac2 (encoding NKB) and kiss1 mRNA  
305 expression in mice (36,37), which are critical components of the GnRH pulse generator and  
306 there is an increase in ARC kiss1 promoter activity during pubertal development (38). The  
307 amygdala is known to influence pubertal timing in primates (17), and more specifically, the  
308 MePD has been shown to regulate pubertal timing and reproductive function in rodents (4,19),  
309 vis-à-vis MePD kiss1 receptor antagonism delays puberty, reduces the occurrence of  
310 preovulatory LH surges in rats (25) and MePD kiss1 neuronal activation heightens sexual  
311 partner preference in male mice (39). Recently, we have shown optogenetic stimulation of  
312 MePD kiss1 neurons increases GnRH pulse generator frequency in adult female mice (26) and  
313 preliminary data from our lab shows that activation of MePD kiss1 neurons during pubertal  
314 transition advances the onset of first estrous, thus MePD kiss1 neurons may be an upstream  
315 regulator of pubertal timing (40).

316 We explored the effect of chronic psychological stress exposure on pubertal timing, pre-  
317 pubertal GnRH pulse generator activity and anxiety-like behaviour. Stress exposure during the  
318 juvenile period is known to alter pubertal timing and induce anxiety behaviour in mammals,  
319 including rodents, primates and humans (1,2,4,41). Predator odor exposure in rodents is a

320 model for PTSD; increasing fear and anxiety behaviour as well as reducing social interaction  
321 (3). Previously, we have shown that acute TMT exposure suppresses LH pulsatility (5) and  
322 restraint stress, another psychological stressor, inhibits LH pulse frequency while reducing  
323 ARC kiss1 cfos expression in adult mice (42). Moreover, we have shown that cat odor delays  
324 puberty and induces a fear response in rats (4). In the present study we show that the predator  
325 odor, TMT, reduces LH pulsatility and delays the first estrous in female mice. In mice, VO  
326 and FE do not coincide, wherein VO is not tightly coupled to the first ovulation, but rather a  
327 variable time gap exists between VO and FE; the latter associated with first ovulation and  
328 considered the unequivocal marker of puberty in this species (43). Additionally, pre-pubertal  
329 LH pulse frequency in the control group tended to increase potentially marking the acceleration  
330 of the GnRH pulse generator as the time of puberty onset approaches. Contrastingly, pre-  
331 pubertal LH pulse frequency in the TMT-exposed group was significantly lower compared to  
332 controls and we did not observe an increase in GnRH pulse generator activity between pnd 26  
333 and 29.

334 Puberty is a sensitive period where enhanced neuroplasticity provides a context for the impact  
335 of stress on the development of long-term anxiety disorders in humans (44). Early-life stress  
336 increases anxiety-like behaviour in juvenile and adult mice linked to hyper-connectivity  
337 between fronto-limbic circuits, involving the amygdala (45). The medial amygdala is activated  
338 in response to external stressors and electrophysiological recordings reveal that predator urine  
339 robustly activates the MePD, which is associated with delaying pubertal onset (4) and  
340 suppressing LH pulsatility in rodents (5,46). We found that predator odor-induced pubertal  
341 delay was accompanied by increased anxiety-like behaviour, with mice spending significantly  
342 less time in the light compartment of the LDB and in the open arms of the EPM during stress  
343 exposure. Moreover, we observed that mice exposed to TMT exhibited long lasting fear-like  
344 behaviour where they spent significantly less time in the open arm of the EPM compared to

345 controls on pnd 41; 6 days after termination of stress exposure. This is consistent with our  
346 previous studies showing rats exposed to cat odor during pubertal development display  
347 increased long-lasting fear-like behaviour on the EPM even after the termination of stress  
348 exposure (4). Moreover, exposure to fox odor induces long-lasting anxiety on the EPM in rats  
349 (47), while mice exposed to foot-shock stress during adolescence exhibit increased startle  
350 reflexes into adulthood indicative of lasting anxiety-like behaviour (48). Additionally, TMT-  
351 exposed mice showed significantly reduced social interaction with familiar con-specifics  
352 during stress exposure whereas sociability tended to increase along with reproductive  
353 maturation in the control group, which is consistent with our previous observations where  
354 exposure to cat odor during puberty decreased sociability in rats (4).

355 Central administration of CRF inhibits kiss1 expression in the ARC and POA in rats (49). In  
356 women with functional hypothalamic amenorrhea there is a correlation between decreased  
357 serum kisspeptin and increased CRF concentrations (50). Moreover, an endogenous CRF tone  
358 regulates pubertal timing where central administration of CRF in pnd 28 rats delays puberty  
359 onset and administration of astressin-B, a CRFR1 antagonist, advances puberty (28). Central  
360 antagonism of CRFR2 blocks the suppressive effect of stress on LH pulsatility in rodents (51).  
361 These data indicate stress neuropeptides may provide an inhibitory tone on the timing of  
362 puberty. Predator odor activates CRFR2 positive neurons in the medial amygdala of rats (52)  
363 and we have recently shown that TMT-induced suppression of LH pulsatility is mediated by  
364 MePD Ucn3 and CRFR2 signalling in mice (5). In the present study, selective activation of  
365 MePD Ucn3 neurons during pubertal development delayed puberty and suppressed pre-  
366 pubertal LH pulse frequency, demonstrating that MePD Ucn3 signalling plays a key role in  
367 regulating pubertal timing.

368 The MePD has a major GABAergic output to key hypothalamic reproductive nuclei (21,53)  
369 and we know the amygdala exerts an inhibitory brake on pubertal timing (17,19). Ucn3



370 neurons in the medial amygdala have an interneuron-like appearance (54) where Ucn3 fibres  
371 overlap with CRFR2 expression (55,56) and we have shown that antagonism of MePD CRFR2  
372 blocks the suppressive effect of TMT on LH pulse frequency in adult mice (5), thus Ucn3  
373 neurons possibly connect to and signal via CRFR2 within the MePD. Moreover, the majority  
374 of MePD CRFR2 neurons co-express GAD65 and 67 (29) indicating they are GABAergic and  
375 may be involved in mediating stress-induced suppression of the GnRH pulse generator (22,53).  
376 Therefore, MePD Ucn3 neurone activation may modulate pubertal timing possibly via  
377 enhancing GABAergic output to inhibit GnRH pulse generator activity (5,21,23).

378 Our findings show for the first time that early life exposure to a psychosocial stressor disrupts  
379 GnRH pulse generator frequency to delay puberty, and Ucn3 signalling in the MePD may be  
380 involved in mediating this response. These findings provide novel insight into the key  
381 interactions between the emotional stress centres and reproductive centres in the brain that  
382 control pubertal onset in response to the external environment. Alterations in the timed onset  
383 of puberty has major implications later in life with increased risk of diverse adverse outcomes,  
384 including cancer, gynaecologic/obstetric, cardio-metabolic and neuro-cognitive categories in  
385 humans (57). Understanding the mechanisms involved in controlling pubertal timing and the  
386 impact of stress is crucial to ultimately aid future development of more effective treatments for  
387 stress-related disorders of puberty.

### 388 **Acknowledgements**

389 The authors gratefully acknowledge the financial support from UKRI: BBSRC  
390 (BB/S000550/1) and MRC (MR/N022637/1). DI is a PhD student funded by MRC-DTP  
391 studentship at King's College London.

392 **Funding**

393 Grants supporting paper: Financial support from UKRI: BBSRC (BB/S000550/1) and MRC  
394 (MR/N022637/1). DI is a PhD student funded by MRC-DTP studentship at King's College  
395 London.

396 **Conflict of Interest**

397 The authors declare that the research was conducted in the absence of any commercial or  
398 financial relationships that could be construed as a potential conflict of interest.

399 **Data Availability Statement**

400 The original contributions presented in the study are included in the article/supplementary  
401 material. Further inquiries can be directed to the corresponding author.

402 **Ethics Statement**

403 The animal study was reviewed and approved by the Animal Welfare and Ethical Review Body  
404 Committee at King's College London.

405 **Bibliography**

- 406 1. Ponnappakkam A, Gensure R. Effects of stress after Hurricanes Katrina and Rita on  
407 pubertal disorders in children. *Ochsner J.* 2008;8(3):129–33.
- 408 2. Gur RE, Moore TM, Rosen AF, Barzilay R, Roalf DR, Calkins ME, Ruparel K, Scott  
409 JC, Almasly L, Satterthwaite TD, Shinohara RT . Burden of Environmental Adversity  
410 Associated with Psychopathology, Maturation, and Brain Behavior Parameters in  
411 Youths. *JAMA Psychiatry.* 2019;76(9):966–75.
- 412 3. Zoladz PR, Diamond DM . Predator-based psychosocial stress animal model of PTSD:

- 413 Preclinical assessment of traumatic stress at cognitive, hormonal, pharmacological,  
414 cardiovascular and epigenetic levels of analysis. *Exp Neurol.* 2016;284(Pt B):211–9.
- 415 4. Li XF, Adekunbi DA, Alobaid HM, Li S, Pilot M, Lightman SL, O’Byrne KT . Role  
416 of the posterodorsal medial amygdala in predator odour stress-induced puberty delay  
417 in female rats. *J Neuroendocrinol.* 2019;31(6):e12719.
- 418 5. Ivanova D, Li XF, McIntyre C, Liu Y, Kong L, O’Byrne KT . Urocortin3 in the  
419 Posterodorsal Medial Amygdala Mediates Stress-induced Suppression of LH  
420 Pulsatility in Female Mice. *Endocrinology.* 2021;162(12):bqab206.
- 421 6. Wagenmaker ER, Moenter SM. Exposure to acute psychosocial stress disrupts the  
422 luteinizing hormone surge independent of estrous cycle alterations in female mice.  
423 *Endocrinology.* 2017;158(8):2593–602.
- 424 7. Terasawa E, Guerriero KA, Plant TM. Kisspeptin and Puberty in Mammals. *Adv Exp*  
425 *Med Biol.* 2013;784:253–73.
- 426 8. De Roux N, Genin E, Carel JC, Matsuda F, Chaussain JL, Milgrom E.  
427 Hypogonadotropic hypogonadism due to loss of function of the KiSS1-derived peptide  
428 receptor GPR54. *Proc Natl Acad Sci U S A.* 2003;100(19):10972–6.
- 429 9. Seminara SB, Messenger S, Chatzidaki EE, Thresher RR, Acierno Jr JS, Shagoury JK,  
430 Bo-Abbas Y, Kuohung W, Schwinof KM, Hendrick AG, Zahn D . The GPR54 gene as  
431 a regulator of puberty. *N Engl J Med.* 2003;349(17):1614–27.
- 432 10. Plant TM, Ramaswamy S, DiPietro MJ. Repetitive activation of hypothalamic G  
433 protein-coupled receptor 54 with intravenous pulses of kisspeptin in the juvenile  
434 monkey (*Macaca mulatta*) elicits a sustained train of gonadotropin-releasing hormone  
435 discharges. *Endocrinology.* 2006;147(2):1007–13.
- 436 11. Navarro VM, Fernandez-Fernandez R, Castellano JM, Roa J, Mayen A, Barreiro ML,  
437 Gaytan F, Aguilar E, Pinilla L, Dieguez C, Tena-Sempere M . Advanced vaginal

- 438 opening and precocious activation of the reproductive axis by KiSS-1 peptide, the  
439 endogenous ligand of GPR54. *J Physiol.* 2004;561(2):379–86.
- 440 12. Clarkson J, Han SY, Piet R, McLennan T, Kane GM, Ng J, Porteous RW, Kim JS,  
441 Colledge WH, Iremonger KJ, Herbison AE. Definition of the hypothalamic GnRH  
442 pulse generator in mice. *Proc Natl Acad Sci U S A.* 2017;114(47):e10216–23.
- 443 13. Qiu J, Nestor CC, Zhang C, Padilla SL, Palmiter RD, Kelly MJ, Rønnekleiv OK .  
444 High-frequency stimulation-induced peptide release synchronizes arcuate kisspeptin  
445 neurons and excites GnRH neurons. *Elife.* 2016;5:e16246.
- 446 14. Voliotis M, Li XF, De Burgh R, Lass G, Lightman SL, O’Byrne KT, Tsaneva-  
447 Atanasova K . The Origin of GnRH pulse generation: An integrative mathematical-  
448 experimental approach. *J Neurosci.* 2019;39(49):9738–47.
- 449 15. Liu X, Yeo SH, McQuillan HJ, Herde MK, Hessler S, Cheong I, Porteous R, Herbison  
450 AE . Highly redundant neuropeptide volume co-transmission underlying episodic  
451 activation of the gnRH neuron dendron. *Elife.* 2021;10:e62455.
- 452 16. Wang L, Moenter SM. Differential Roles of Hypothalamic AVPV and Arcuate  
453 Kisspeptin Neurons in Estradiol Feedback Regulation of Female Reproduction.  
454 *Neuroendocrinology.* 2020;110(3–4):172–84.
- 455 17. Stephens SBZ, Raper J, Bachevalier J, Wallen K. Neonatal amygdala lesions advance  
456 pubertal timing in female rhesus macaques. *Psychoneuroendocrinology.* 2015;51:307–  
457 17.
- 458 18. Bar-Sela M, Critchlow V. Delayed puberty following electrical stimulation of  
459 amygdala in female rats. *Am J Physiol.* 1966;211(5):1103–7.
- 460 19. Li XF, Hu MH, Hanley BP, Lin YS, Poston L, Lightman SL, O’Byrne KT . The  
461 posterodorsal medial amygdala regulates the timing of puberty onset in female rats.  
462 *Endocrinology.* 2015;156(10):3725–36.

- 463 20. Choi GB, Dong HW, Murphy AJ, Valenzuela DM, Yancopoulos GD, Swanson LW,  
464 Anderson DJ . Lhx6 delineates a pathway mediating innate reproductive behaviors  
465 from the amygdala to the hypothalamus. *Neuron*. 2005;46(4):647–60.
- 466 21. Keshavarzi S, Sullivan RKP, Ianno DJ, Sah P. Functional properties and projections of  
467 neurons in the medial amygdala. *J Neurosci*. 2014;34(26):8699–715.
- 468 22. Moore AM, Coolen LM, Lehman MN. Kisspeptin/Neurokinin B/Dynorphin (KNDy)  
469 cells as integrators of diverse internal and external cues: evidence from viral-based  
470 monosynaptic tract-tracing in mice. *Sci Rep*. 2019;9(1):1–5.
- 471 23. Yeo SH, Kyle V, Blouet C, Jones S, Colledge WH. Mapping neuronal inputs to Kiss1  
472 neurons in the arcuate nucleus of the mouse. *PLoS One*. 2019;14(3):e0213927.
- 473 24. Kim J, Semaan SJ, Clifton DK, Steiner RA, Dhamija S, Kauffman AS. Regulation of  
474 Kiss1 expression by sex steroids in the amygdala of the rat and mouse. *Endocrinology*.  
475 2011;152(5):2020–30.
- 476 25. Adekunbi DA, Li XF, Li S, Adegoke OA, Iranloye BO, Morakinyo AO, Lightman SL,  
477 Taylor PD, Poston L, O’Byrne KT . Role of amygdala kisspeptin in pubertal timing in  
478 female rats. *PLoS One*. 2017;12(8):e0183596.
- 479 26. Lass G, Li XF, de Burgh RA, He W, Kang Y, Hwa-Yeo S, Sinnott-Smith LC,  
480 Manchishi SM, Colledge WH, Lightman SL, O’Byrne KT . Optogenetic stimulation of  
481 kisspeptin neurones within the posterodorsal medial amygdala increases luteinising  
482 hormone pulse frequency in female mice. *J Neuroendocrinol*. 2020;32(2):e12823.
- 483 27. Govic A, Paolini AG. In vivo electrophysiological recordings in amygdala subnuclei  
484 reveal selective and distinct responses to a behaviorally identified predator odor. *J*  
485 *Neurophysiol*. 2015;113(5):1423–36.
- 486 28. Kinsey-Jones JS, Li XF, Knox AM, Lin YS, Milligan SR, Lightman SL, O’Byrne KT .  
487 Corticotrophin-releasing factor alters the timing of puberty in the female rat. *J*

- 488 Neuroendocrinol. 2010;22(2):102–9.
- 489 29. Shemesh Y, Forkosh O, Mahn M, Anpilov S, Sztainberg Y, Manashirov S,  
490 Shlapobersky T, Elliott E, Tabouy L, Ezra G, Adler ES . Ucn3 and CRF-R2 in the  
491 medial amygdala regulate complex social dynamics. Nat Neurosci. 2016;19(11):1489–  
492 96.
- 493 30. Jamieson PM, Li C, Kukura C, Vaughan J, Vale W. Urocortin 3 modulates the  
494 neuroendocrine stress response and is regulated in rat amygdala and hypothalamus by  
495 stress and glucocorticoids. Endocrinology. 2006;147(10):4578–88.
- 496 31. Paxinos G, Franklin KB . Mouse Brain in Stereotaxic Coordinates. Acad Press.  
497 2019;5:246.
- 498 32. Zhan J, Komal R, Keenan WT, Hattar S, Fernandez DC . Non-invasive strategies for  
499 chronic manipulation of dREADT-controlled neuronal activity. J Vis Exp.  
500 2019;2019(150):e59439.
- 501 33. Steyn FJ, Wan Y, Clarkson J, Veldhuis JD, Herbison AE, Chen C. Development of a  
502 methodology for and assessment of pulsatile luteinizing hormone secretion in juvenile  
503 and adult male mice. Endocrinology. 2013;154(12):4939–45.
- 504 34. Vidal A, Zhang Q, Médigue C, Fabre S, Clément F. Dynpeak: An algorithm for pulse  
505 detection and frequency analysis in hormonal time series. PLoS One.  
506 2012;7(7):e39001.
- 507 35. Fernandes C, File SE. The influence of open arm ledges and maze experience in the  
508 elevated plus-maze. Pharmacol Biochem Behav. 1996;54(1):31–40.
- 509 36. Gill JC, Navarro VM, Kwong C, Noel SD, Martin C, Xu S, Clifton DK, Carroll RS,  
510 Steiner RA, Kaiser UB . Increased Neurokinin B (Tac2) Expression in the Mouse  
511 Arcuate Nucleus Is an Early Marker of Pubertal Onset with Differential Sensitivity to  
512 Sex Steroid-Negative Feedback than Kiss1. Endocrinology. 2012;153(10):4883.

- 513 37. Simavli S, Thompson IR, Maguire CA, Gill JC, Carroll RS, Wolfe A, Kaiser UB,  
514 Navarro VM . Substance P Regulates Puberty Onset and Fertility in the Female  
515 Mouse. *Endocrinology*. 2015;156(6):2313–22.
- 516 38. Wright H, Aylwin CF, Toro CA, Ojeda SR, Lomniczi A . Polycomb represses a gene  
517 network controlling puberty via modulation of histone demethylase Kdm6b  
518 expression. *Sci Rep*. 2021;11(1):1–7.
- 519 39. Adekunbi DA, Li XF, Lass G, Shetty K, Adegoke OA, Yeo SH, Colledge WH,  
520 Lightman SL, O’Byrne KT. Kisspeptin neurones in the posterodorsal medial amygdala  
521 modulate sexual partner preference and anxiety in male mice. *J Neuroendocrinol*.  
522 2018;30(3):e12572.
- 523 40. Ivanova D, Li XF, McIntyre C, O’Byrne KT . Chronic Exposure to Predator Odour  
524 Stress Disrupts LH Pulsatility and Delays Puberty While Activation of Amygdala  
525 Kisspeptin Advances Puberty. *Endocr Soc*. 2020;Supplement:SUN-LB49.
- 526 41. Pincus M, Godfrey JR, Feczko E, Earl E, Miranda-Dominguez O, Fair D, Wilson ME,  
527 Sanchez MM, Kelly C . Chronic psychosocial stress and experimental pubertal delay  
528 affect socioemotional behavior and amygdala functional connectivity in adolescent  
529 female rhesus macaques. *Psychoneuroendocrinology*. 2021;127:105154.
- 530 42. Yang JA, Song CI, Hughes JK, Kreisman MJ, Parra RA, Haisenleder DJ, Kauffman  
531 AS, Breen KM . Acute psychosocial stress inhibits LH pulsatility and kiss1 neuronal  
532 activation in female mice. *Endocrinology*. 2017;158(11):3716–23.
- 533 43. Gaytan F, Morales C, Leon S, Heras V, Barroso A, Avendaño MS, Vazquez MJ,  
534 Castellano JM, Roa J, Tena-Sempere M . Development and validation of a method for  
535 precise dating of female puberty in laboratory rodents: The puberty ovarian maturation  
536 score (Pub-Score). *Sci Rep*. 2017;7(1):1–11.
- 537 44. Marshall AD . Developmental timing of trauma exposure relative to puberty and the

- 538 nature of psychopathology among adolescent girls. *J Am Acad Child Adolesc*  
539 *Psychiatry*. 2016;55(1):25–32.
- 540 45. Johnson FK, Delpech JC, Thompson GJ, Wei L, Hao J, Herman P, Hyder F, Kaffman  
541 A . Amygdala hyper-connectivity in a mouse model of unpredictable early life stress.  
542 *Transl Psychiatry*. 2018;8(1):1–14.
- 543 46. Lin Y, Li XF, Lupi M, Kinsey-Jones JS, Shao B, Lightman SL, O’Byrne KT . The role  
544 of the medial and central amygdala in stress-induced suppression of pulsatile LH  
545 secretion in female rats. *Endocrinology*. 2011;152(2):545–55.
- 546 47. Dopfel D, Perez PD, Verbitsky A, Bravo-Rivera H, Ma Y, Quirk GJ, Zhang N .  
547 Individual variability in behavior and functional networks predicts vulnerability using  
548 an animal model of PTSD. *Nat Commun*. 2019;10(1):1–2.
- 549 48. Chester JA, Barrenha GD, Hughes ML, Keuneke KJ . Age- and sex-dependent effects  
550 of footshock stress on subsequent alcohol drinking and acoustic startle behavior in  
551 mice selectively bred for high-alcohol preference. *Alcohol Clin Exp Res*.  
552 2008;32(10):1782–94.
- 553 49. Kinsey-Jones JS, Li XF, Knox AM, Wilkinson ES, Zhu XL, Chaudhary AA, Milligan  
554 SR, Lightman SL, O’byrne KT . Down-regulation of hypothalamic kisspeptin and its  
555 receptor, *Kiss1r*, mRNA expression is associated with stress-induced suppression of  
556 luteinising hormone secretion in the female rat. *J Neuroendocrinol*. 2009;21(1):20–9.
- 557 50. Agnieszka Podfigurna, Anna Szeliga BM. Serum kisspeptin and corticotropin-  
558 releasing hormone levels in patients with functional hypothalamic amenorrhea.  
559 *Gynecol Reprod Endocrinol Metab*. 2020;1(1):37–42.
- 560 51. Li XF, Bowe JE, Lightman SL, O’Byrne KT . Role of corticotropin-releasing factor  
561 receptor-2 in stress-induced suppression of pulsatile luteinizing hormone secretion in  
562 the rat. *Endocrinology*. 2005;146(1):318–22.



- 563 52. Fekete ÉM, Zhao Y, Li C, Sabino V, Vale WW, Zorrilla EP. Social defeat stress  
564 activates medial amygdala cells that express type 2 corticotropin-releasing factor  
565 receptor mRNA. *Neuroscience*. 2009;162(1):5–13.
- 566 53. Pardo-Bellver C, Cádiz-Moretti B, Novejarque A, Martínez-García F, Lanuza E.  
567 Differential efferent projections of the anterior, posteroventral, and posterodorsal  
568 subdivisions of the medial amygdala in mice. *Front Neuroanat*. 2012;6(33):1–26.
- 569 54. Deussing JM, Breu J, Kühne C, Kallnik M, Bunck M, Glasl L, Yen YC, Schmidt MV,  
570 Zurmühlen R, Vogl AM, Gailus-Durner V . Urocortin 3 modulates social  
571 discrimination abilities via corticotropin-releasing hormone receptor type 2. *J*  
572 *Neurosci*. 2010;30(27):9103–16.
- 573 55. Cavalcante JC, Sita LV, Mascaro MB, Bittencourt JC, Elias CF. Distribution of  
574 urocortin 3 neurons innervating the ventral premammillary nucleus in the rat brain.  
575 *Brain Res*. 2006;1089(1):116–25.
- 576 56. Li C, Vaughan J, Sawchenko PE, Vale WW. Urocortin III-immunoreactive projections  
577 in rat brain: Partial overlap with sites of type 2 corticotrophin-releasing factor receptor  
578 expression. *J Neurosci*. 2002;22(3):991–1001.
- 579 57. Day FR, Elks CE, Murray A, Ong KK, Perry JRB. Puberty timing associated with  
580 diabetes, cardiovascular disease and also diverse health outcomes in men and women:  
581 the UK Biobank study. *Sci Rep*. 2015;5(1):1–12.

582

583 **Figure 1.** Female C57Bl6/J mice chronically exposed to 2,4,5-Trimethylthiazole (TMT) from  
584 post-natal day (pnd) 21 for 14 days showed delayed first estrous (FE) without affecting vaginal  
585 opening (VO) and body weight (BW). Effect of chronic TMT exposure on day of VO (A), FE  
586 (B) and (C) BW weight gain between pnd 21 and 45. +++p<0.0001 Control group (combined  
587 water control: n=6; ethyl vanillin control: n=4) vs TMT group (n=14).

588 **Figure 2.** Female C57Bl6/J mice chronically exposed to 2,4,5-Trimethylthiazole (TMT) from  
589 post-natal day (pnd) 21 for 14 days showed suppressed pre-pubertal pulsatile luteinising  
590 hormone (LH) secretion on pnd 26 and 29. Representative LH pulse profile with (A) control  
591 mouse on pnd 26, (B) TMT-exposed mouse on pnd 26, (C) control mouse on pnd 29 and (D)  
592 TMT-exposed mouse on pnd 29. (E), Summary of LH pulse frequency on pnd 26 and 29 of  
593 control and TMT-exposed group during the 80 min blood sampling period. LH pulses detected  
594 by the DynePeak algorithm are indicated with an asterisk located above each pulse on the  
595 representative LH pulse profiles.  $++p<0.001$  control group (combined water control: n=6;  
596 ethyl vanillin control: n=3) vs. TMT-exposed group (n=8) on pnd 26 and 29.

597 **Figure 3.** Female C57Bl6/J mice chronically exposed to 2,4,5-Trimethylthiazole (TMT)  
598 showed increased anxiety-like behavior on the light-dark box (LDB) and elevated plus maze  
599 (EPM) and decreased social interaction with familiar conspecifics on the social interaction (SI)  
600 test. (A) Summary of time spent in the light compartment of the LDB on post-natal day (pnd)  
601 19 (before beginning of TMT-exposure), 27 (during TMT exposure) and 40 (after termination  
602 of TMT-exposure), (B) time spent socially interacting with familiar conspecifics on pnd 19, 27  
603 and 40, and (C) time spent in the open arm of the EPM on pnd 20, 28 and 41.  $+p<0.05$  time  
604 spent on LDB, SI and EPM of control group (combined water control: n=6; ethyl vanillin  
605 control: n=4) vs TMT-exposed group (n=14) on pnd 27 or 28 (during TMT-exposure);  
606  $####p<0.0001$  time spent in the open arm of the EPM in the TMT-exposed group on pnd 28 vs  
607 pnd 41.

608 **Figure 4.** Expression of AAV5-hSyn-DIO-HA-hM3D(Gq)-IRES-mCitrine in posterodorsal  
609 medial amygdala (MePD) Urocortin 3 (Ucn3) neurons. (A-F) Representative dual fluorescence  
610 photomicrographs of the MePD from a Ucn3-cre-tdTomato female mouse injected with  
611 AAV5-hSyn-DIO-HA-hM3D(Gq)-IRES-mCitrine. Ucn3 neurons labelled with m-Citrine (A)

612 and tdTomato (C) appear yellow/orange (E). (B), (D) and (F) are a higher power view of (A),  
613 (C) and (E) respectively. Scale bars represent A, C, E 100  $\mu$ m and B, D, F 25  $\mu$ m; OT, Optic  
614 tract (blue line).

615 **Figure 5.** DREADD (hM3D) activation of urocortin 3 (Ucn3) neurons in the posterodorsal  
616 sub-nucleus of the medial amygdala (MePD) of Ucn3-cre-tdTomato female mice from post-  
617 natal day (pnd) 21 for 14 days delays first estrous (FE) without affecting vaginal opening (VO)  
618 and body weight (BW) in urocortin3-cre-tdTomato female mice. Effect of MePD Ucn3  
619 activation on day of VO (A), FE (B) and (C) BW weight gain between pnd 21 and 45. +p<0.05  
620 Control group (combined control AAV: n=6; cre-negative control: n=4; no CNO n=3) vs  
621 DREADD group (n=8).

622 **Figure 6.** DREADD (hM3D) activation of urocortin 3 (Ucn3) neurons in the posterodorsal  
623 sub-nucleus of the medial amygdala (MePD) in Ucn3-cre-tdTomato female mice from post-  
624 natal day (pnd) 21 for 14 days suppresses pre-pubertal LH pulse frequency sampled on pnd 29.  
625 Representative LH pulse profile from Ucn3-cre-tdTomato female mice on pnd 29 with (A)  
626 control mouse, (B) DREADD (hM3D) activated mouse, (C) Summary of LH pulse frequency  
627 on pnd 29 of control and DREADD group during the 80 min blood sampling period. LH pulses  
628 detected by the DynePeak algorithm are indicated with an asterisk located above each pulse on  
629 the representative LH pulse profiles. +p<0.05 Control group (combined control AAV: n=3;  
630 cre-negative control: n=3) vs DREADD group (n=5).

# Figure 1

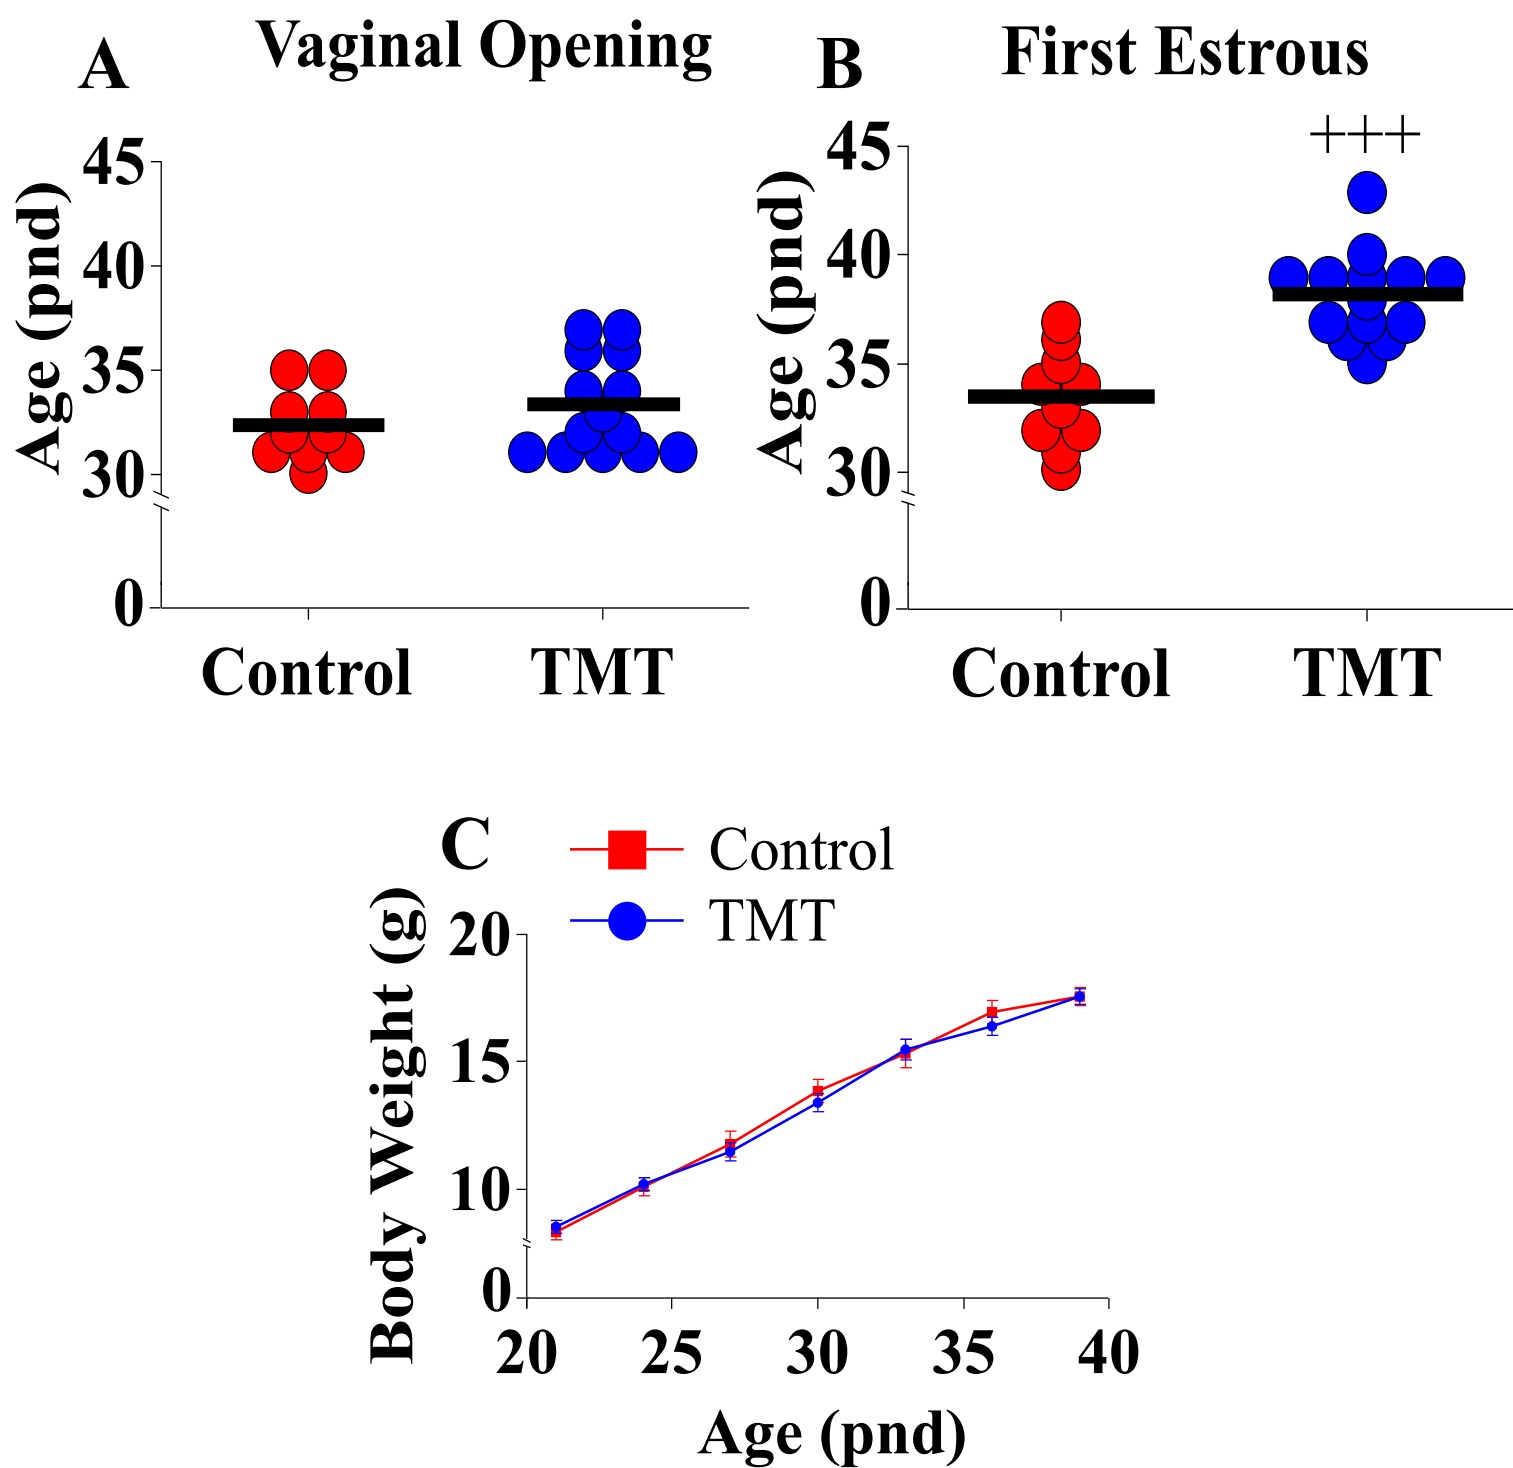

# Figure 2

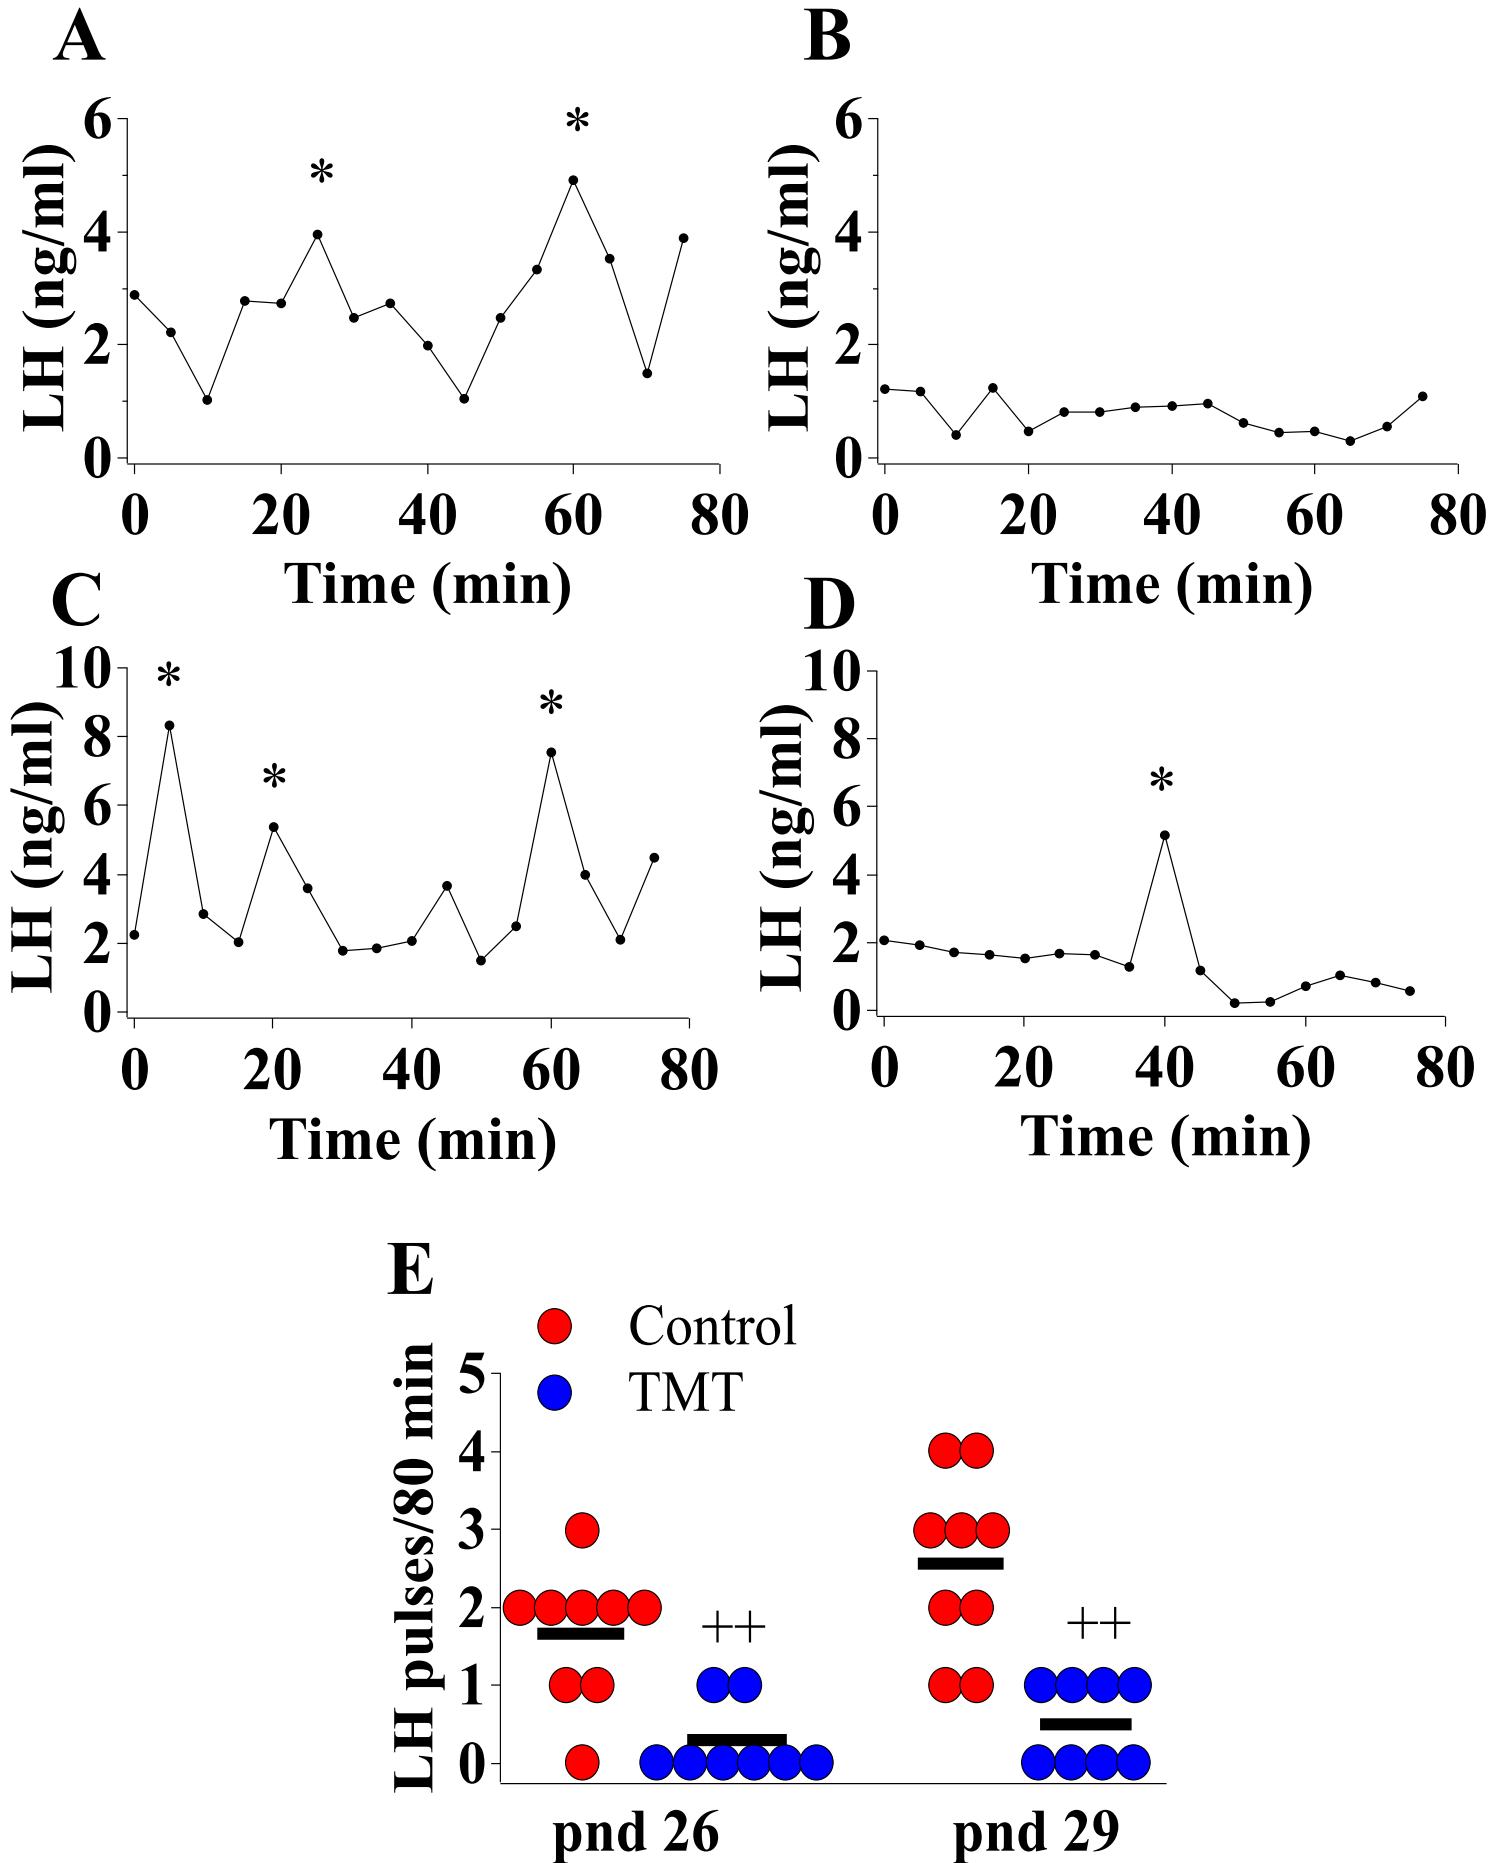

# Figure 3

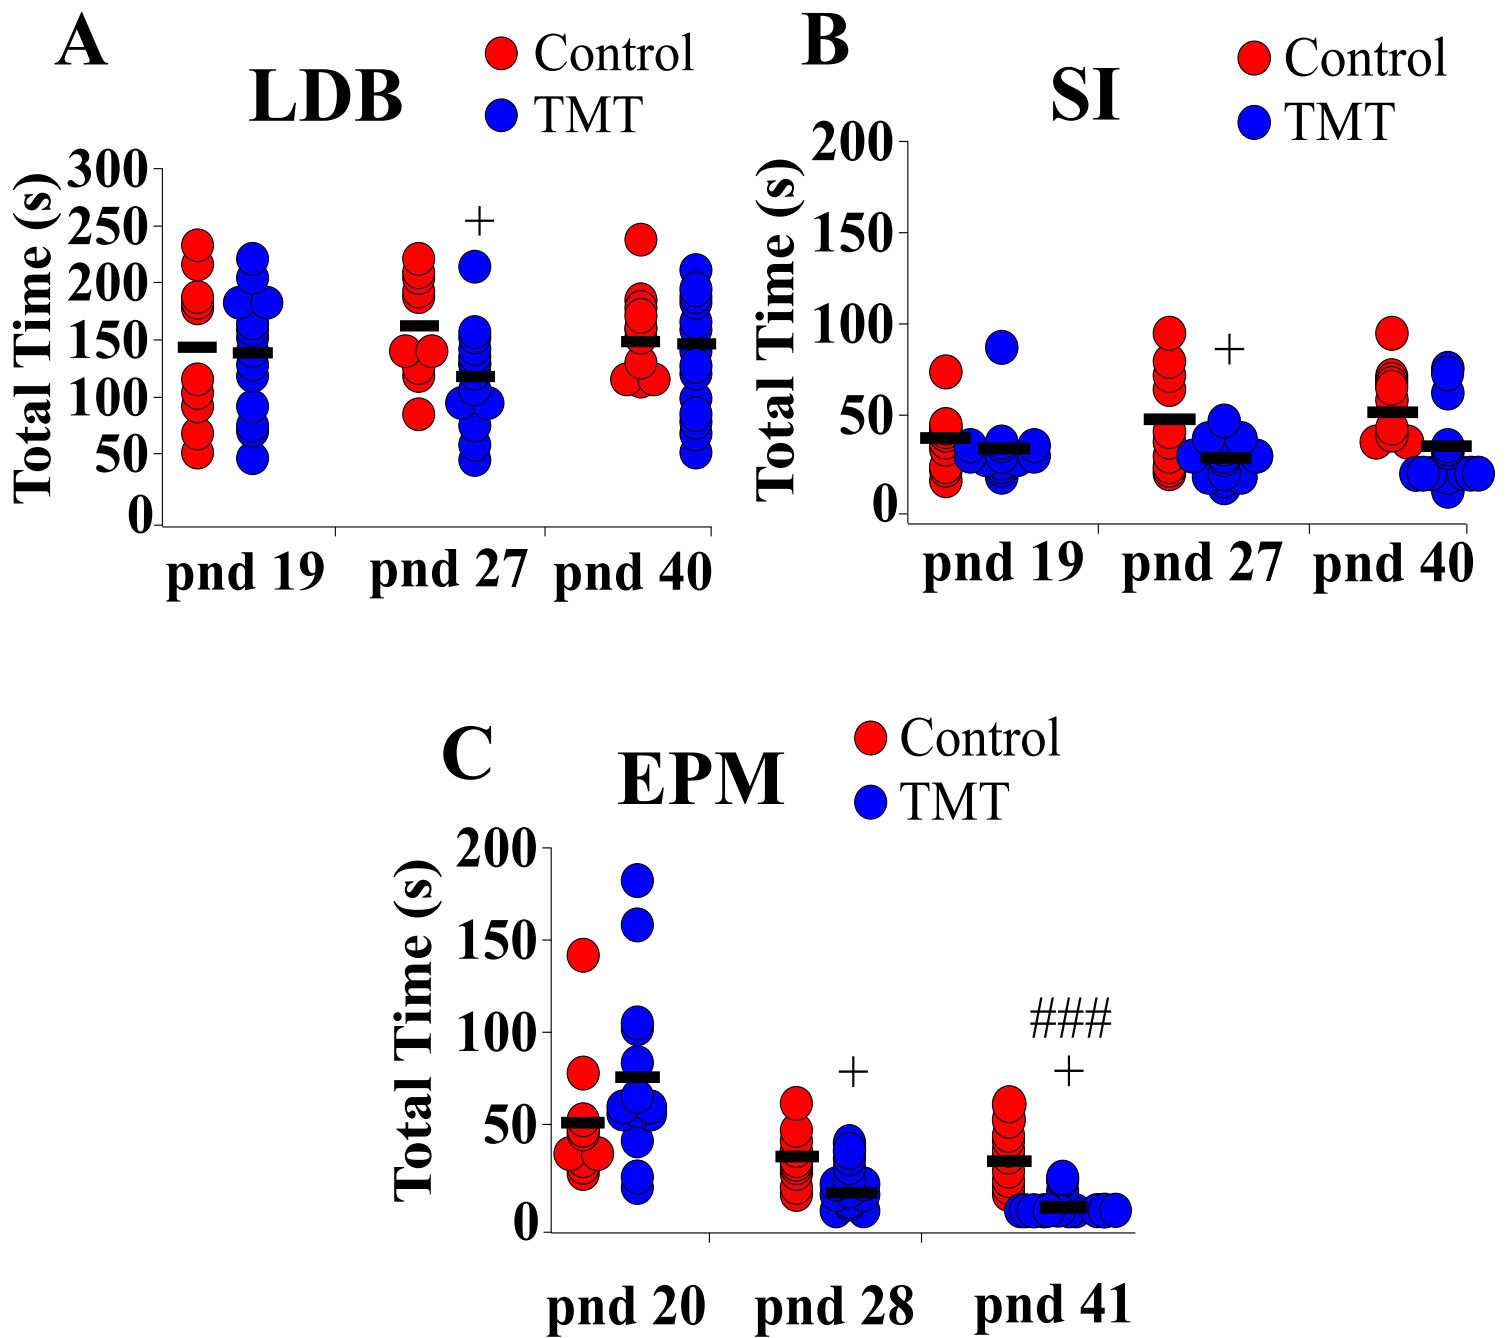

# Figure 4

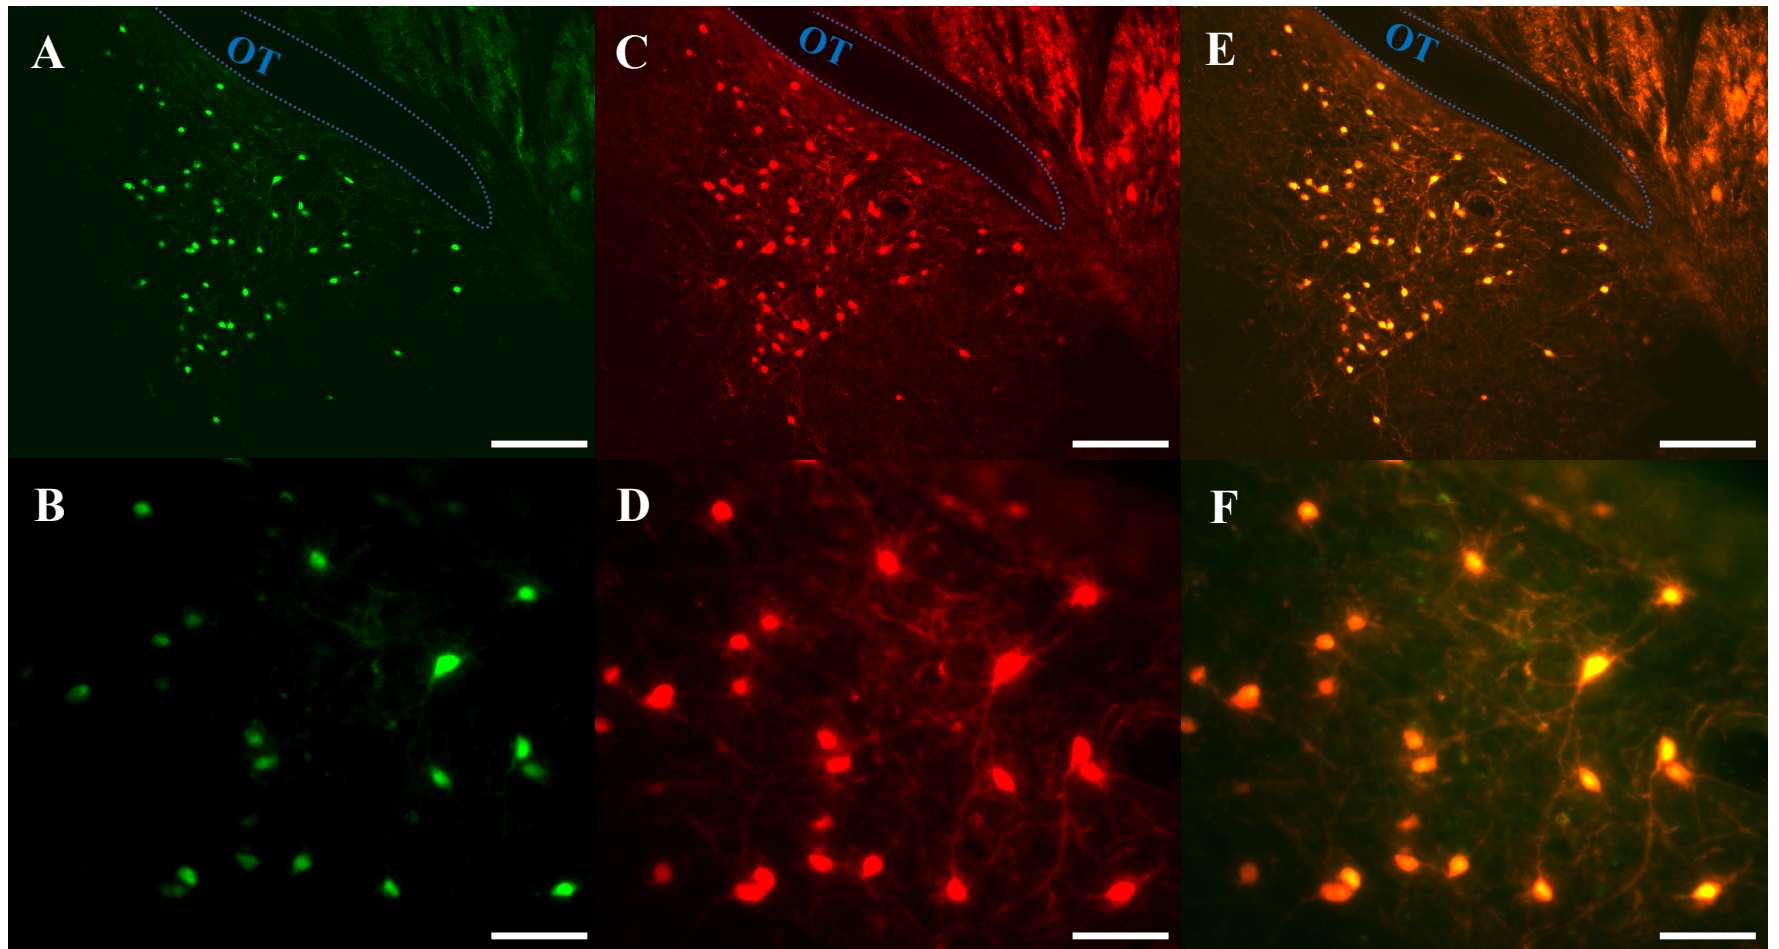

# Figure 5

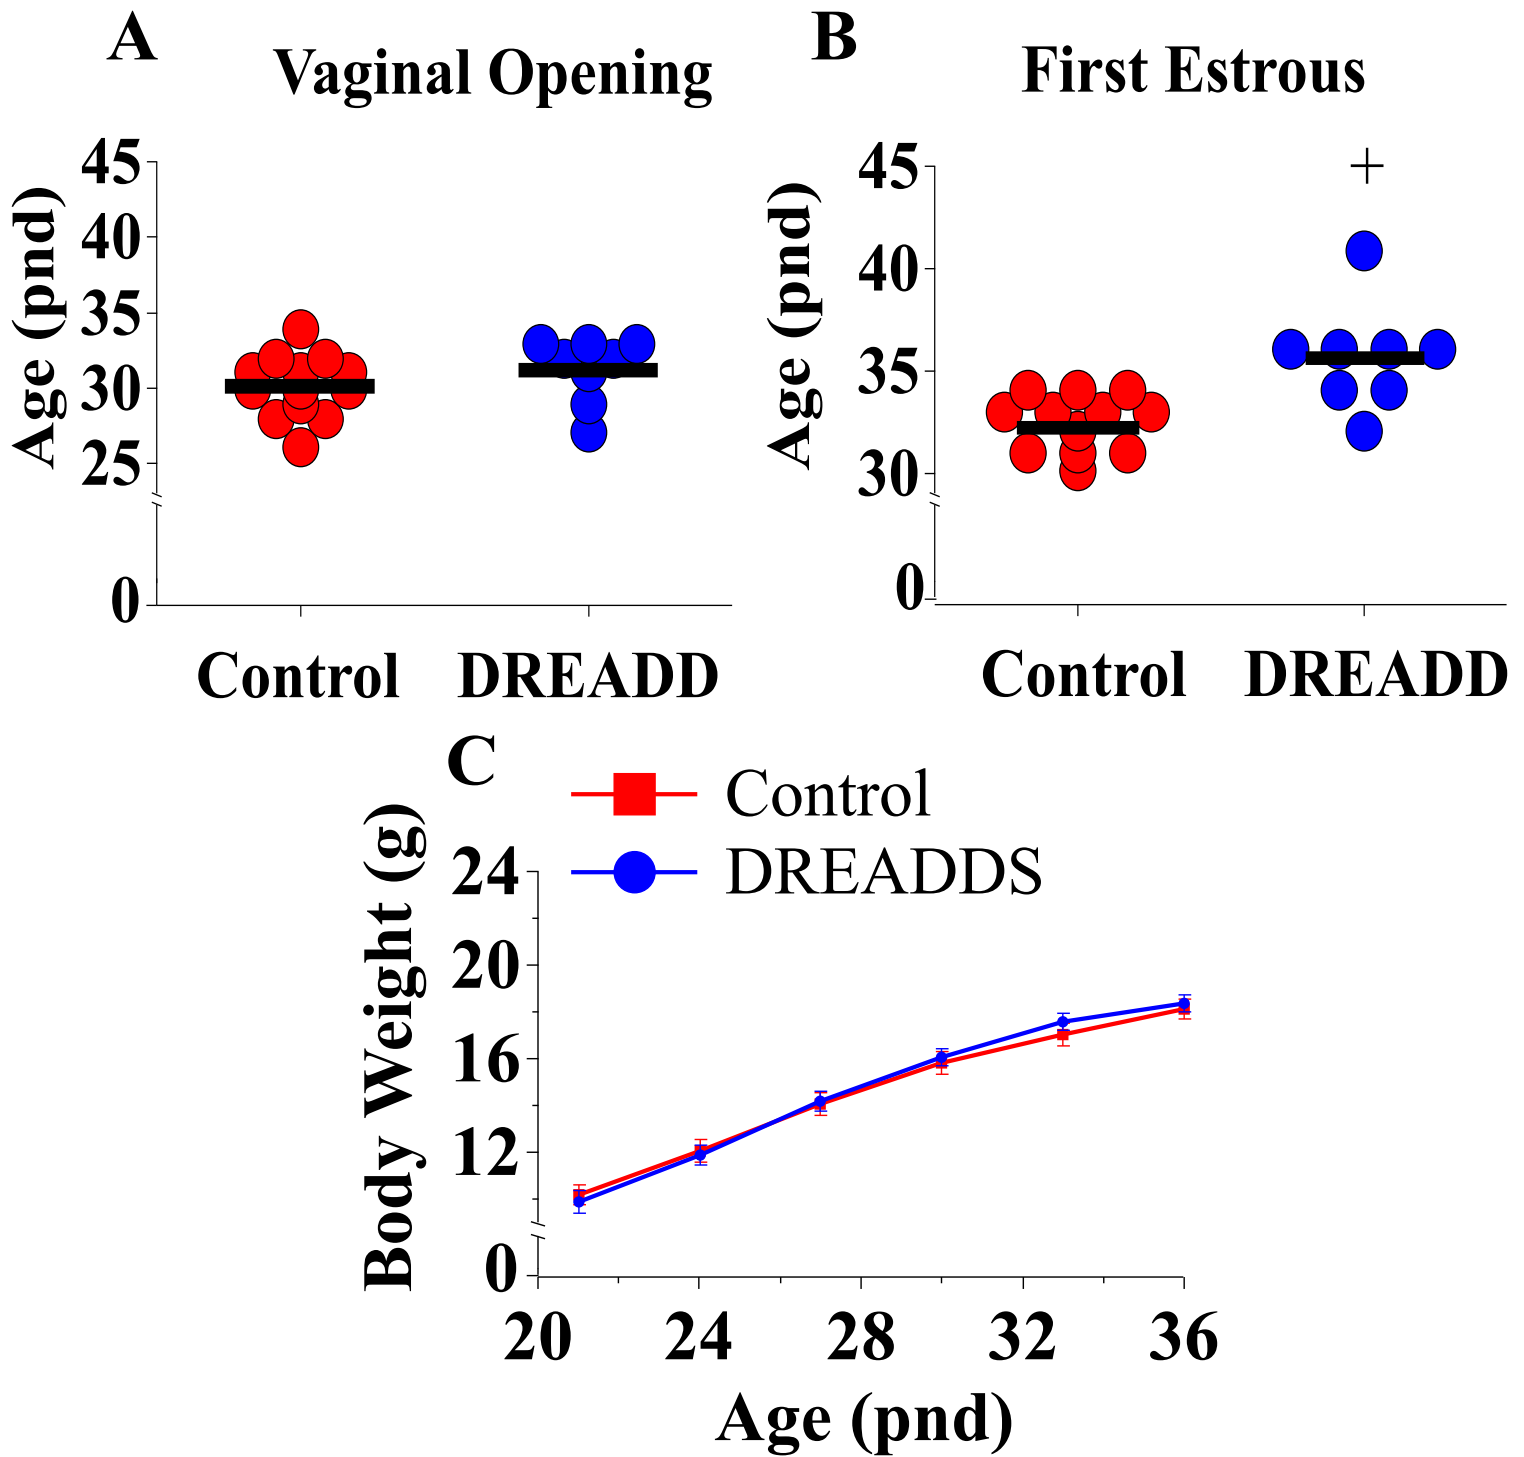



# Figure 6

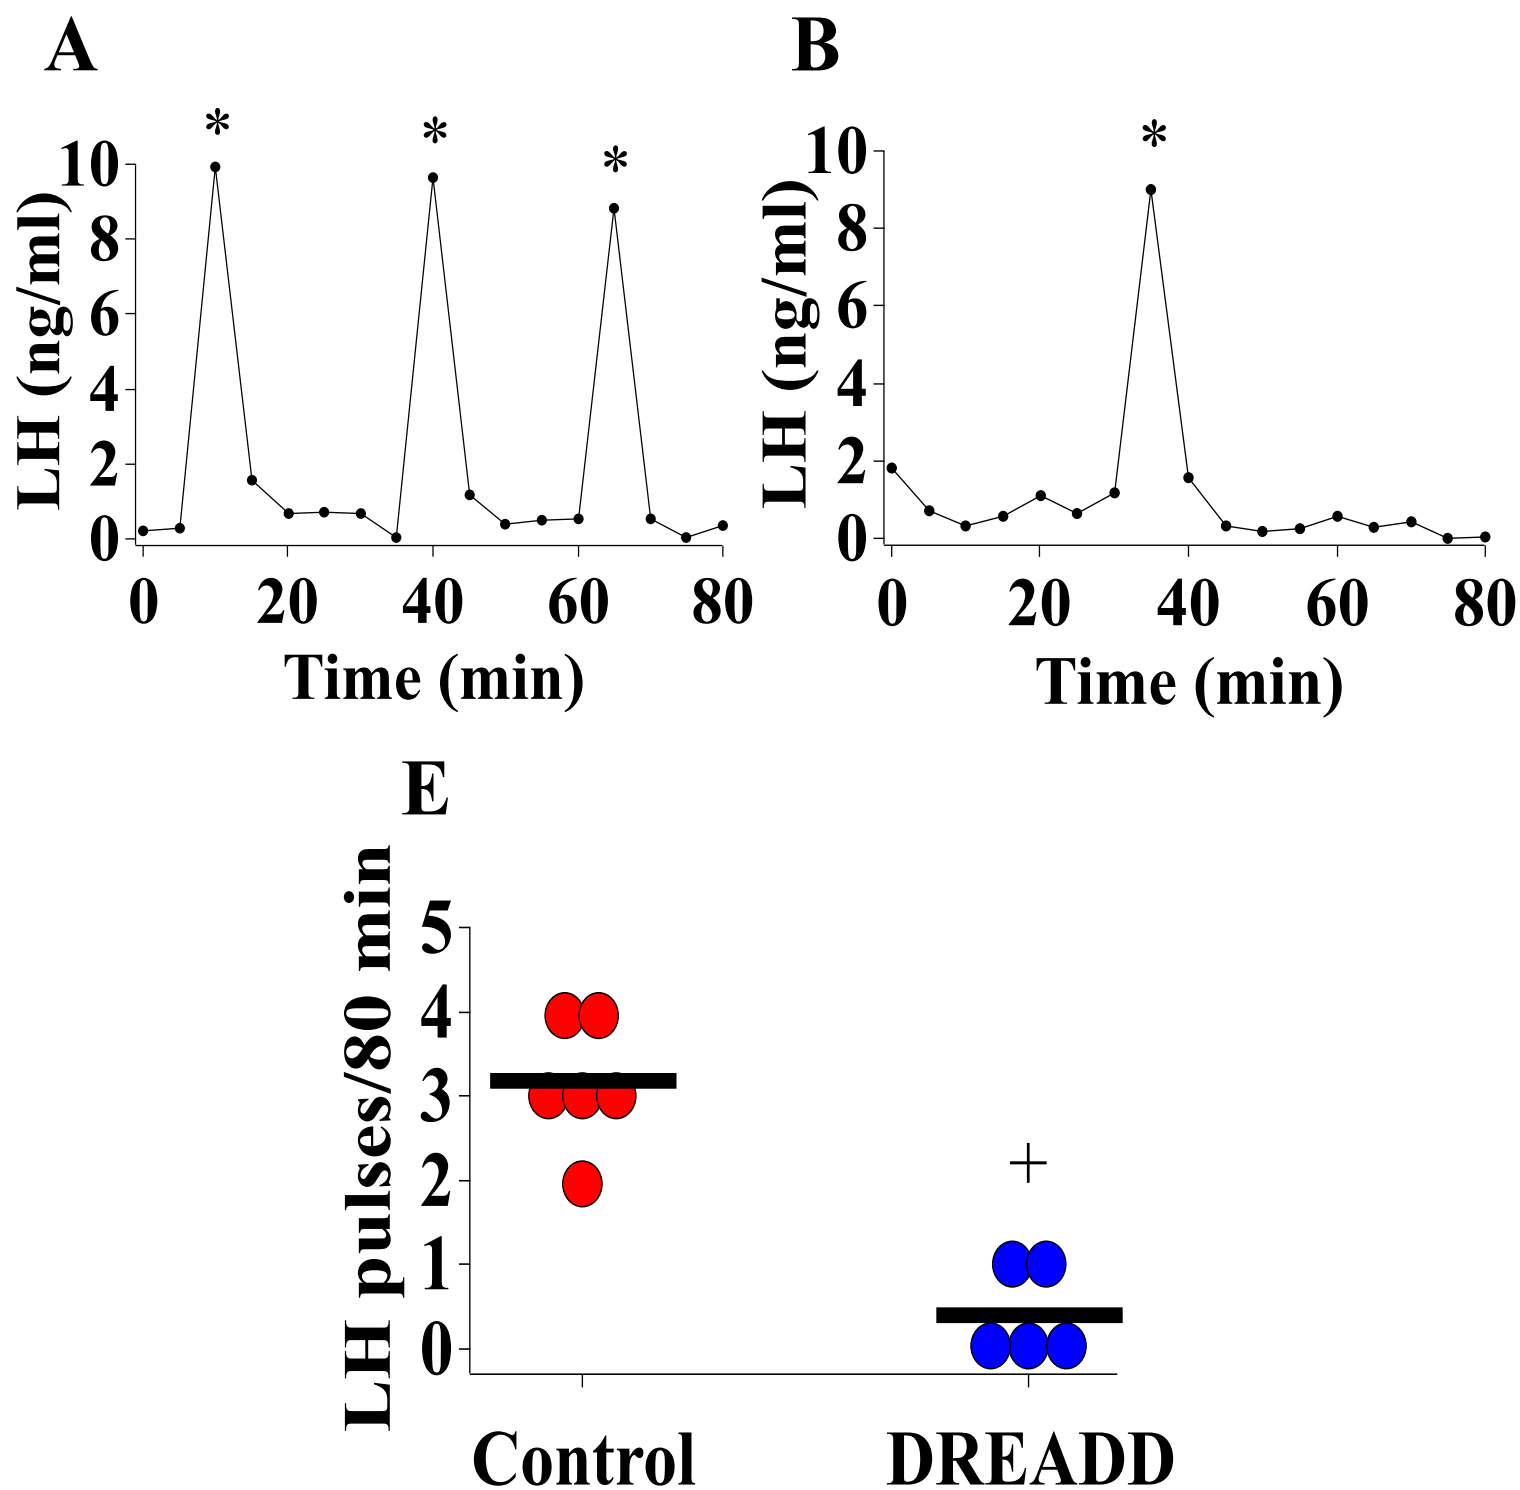

Source: https://www.biorxiv.org/content/10.1101/2022.01.27.477996v2.full.pdf
